# Supplementary material for: M7G Methylation-Regulated Genes Coordinate Gastric Cancer Proliferation and Immune Evasion: Functional Characterization of WDR4 and BUD23
Source: Research Square preprint supplement (doi:10.21203/rs.3.rs-6389159/v1), 2025-04-28
Supplement: Supplementary file 1 [file ff9c817366697a47bc335041.xlsx]

## Sheet: S1
Table-S1: Basic information of master regulators
Master Regulator	Subtype	Color	Character
ACTR5	1	blue	pentagram
ADNP	1	blue	pentagram
AGO2	1	blue	pentagram
AHCTF1	1	blue	pentagram
C1QBP	1	blue	pentagram
CAND1	1	blue	pentagram
CHAF1B	1	blue	pentagram
CHD7	1	blue	pentagram
DNMT3B	1	blue	pentagram
ESF1	1	blue	pentagram
ETV4	1	blue	pentagram
FUBP1	1	blue	pentagram
GRHL2	1	blue	pentagram
ILF2	1	blue	pentagram
KLHL31	1	blue	pentagram
MAPK15	1	blue	pentagram
MCM2	1	blue	pentagram
MCM4	1	blue	pentagram
NELFCD	1	blue	pentagram
NR6A1	1	blue	pentagram
POLR3G	1	blue	pentagram
RBM39	1	blue	pentagram
RFC1	1	blue	pentagram
RNF2	1	blue	pentagram
SETDB1	1	blue	pentagram
TADA1	1	blue	pentagram
TAF4	1	blue	pentagram
TARBP1	1	blue	pentagram
TIMELESS	1	blue	pentagram
TOP2A	1	blue	pentagram
ZBED4	1	blue	pentagram
ZFP64	1	blue	pentagram
ZKSCAN1	1	blue	pentagram
ZNF28	1	blue	pentagram
ZNF473	1	blue	pentagram
ZNF664	1	blue	pentagram
ZNF695	1	blue	pentagram
IFNG	2	green	diamond
STAT1	2	green	diamond
LIF	2	green	diamond
ELF1	2	green	diamond
PARP14	2	green	diamond
MCM2	3	yellow	triangle
MCM4	3	yellow	triangle
DMBX1	3	yellow	triangle
LIN54	3	yellow	triangle
UHRF1	3	yellow	triangle
SFMBT1	3	yellow	triangle
LIF	3	yellow	triangle
TIMELESS	3	yellow	triangle
TFDP1	3	yellow	triangle
GRHL2	3	yellow	triangle
SOX9	3	yellow	triangle
CDCA7	3	yellow	triangle
ZDHHC9	3	yellow	triangle
CHAF1B	3	yellow	triangle
KAT2A	3	yellow	triangle
WDR77	3	yellow	triangle
TTF2	3	yellow	triangle
ZNF367	3	yellow	triangle
IFNG	3	yellow	triangle
CENPK	3	yellow	triangle
ATAD2	3	yellow	triangle
STAT1	3	yellow	triangle
DNMT1	3	yellow	triangle
ZBED4	3	yellow	triangle
MYB	3	yellow	triangle
CENPU	3	yellow	triangle
ZMYND19	3	yellow	triangle
IRF6	3	yellow	triangle
GMCL1	3	yellow	triangle
ZNF695	3	yellow	triangle
FOXP4	3	yellow	triangle
PARP14	3	yellow	triangle
TOP2A	3	yellow	triangle
